# Supplementary material
Source: publisher figshare collection journal article supplement (https://tandf.figshare.com/ndownloader/files/17908292)
Supplement: Supplementary file 1 [file 17908292]

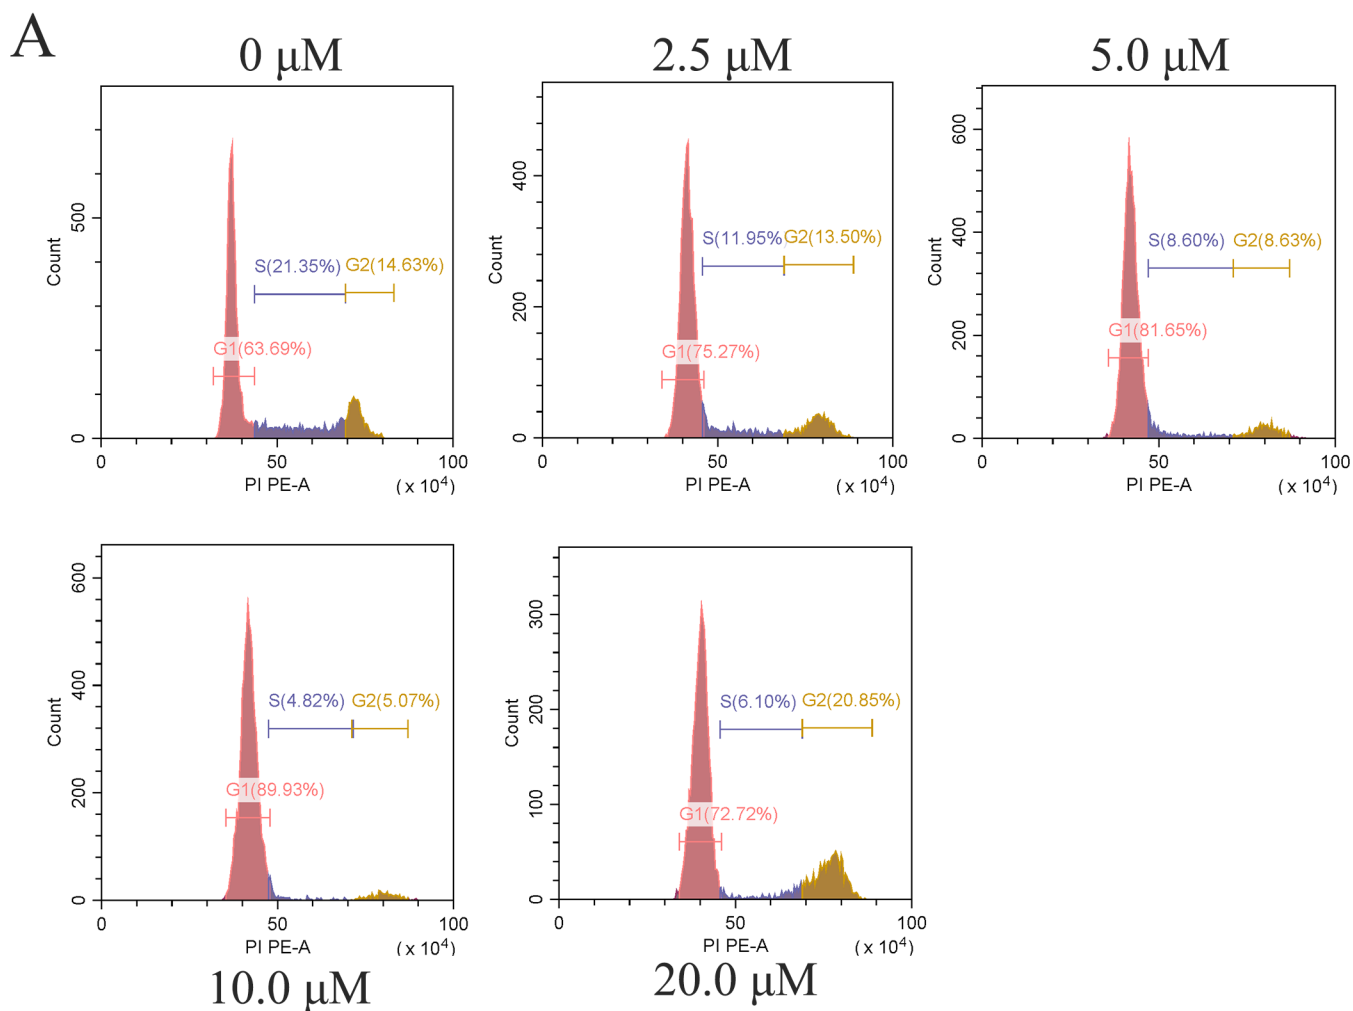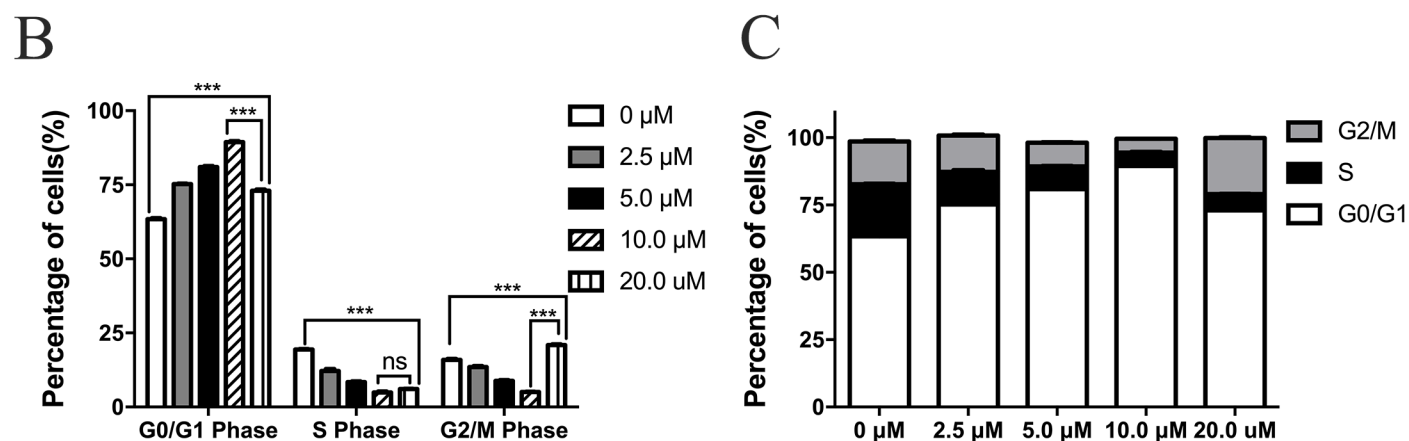

**Supplementary Figure. LEE011 induced cell cycle G<sub>1</sub> phase arrest and promoted cell apoptosis in MDA-MB-231.**

A. Representative images of cell cycle distribution in MDA-MB-231 were displayed after exposed to 0, 2.5, 5.0, 10.0, 20.0 $\mu$ M of LEE011 for 72 hours respectively.

Compared to the control (0 $\mu$ M), G<sub>0</sub>/G<sub>1</sub> portion increased with 9.03% (P<0.001), S portion decreased with 15.25% (P<0.001), and G<sub>2</sub>/M portion increased with 6.22% (P<0.001) in the 20.0 $\mu$ M treat group.

B. Compared with the 10.0 $\mu$ M treat group, G<sub>0</sub>/G<sub>1</sub> portion decreased with 17.21%, (P<0.001), G<sub>2</sub>/M portion increased with 15.78% (P<0.001) in the 20.0 $\mu$ M treat group.

And difference was not significant in S phase (P>0.05) between the two groups.
